# Supplementary material for: A composite metric for predicting benefit from spironolactone in heart failure with preserved ejection fraction
Source: PubMed Central journal article supplement — ESC Heart Fail. 2021 Aug 8;8(5):3495–503. doi: 10.1002/ehf2.13523 (PMC8497352; doi:10.1002/ehf2.13523), 2021-08-08
Supplement: EHF2-8-3495-s002.pdf [file EHF2-8-3495-s002.pdf]

## Supplemental Table 1

### Primary Event Rates by TS grouping, TOPCAT Americas

|                     | Placebo |       |          | Spironolactone |       |          | p     |
|---------------------|---------|-------|----------|----------------|-------|----------|-------|
|                     | Events  | Total | Rate (%) | Events         | Total | Rate (%) |       |
| <b>TS &lt; 1.14</b> | 48      | 198   | 24.2     | 47             | 182   | 25.8     | NS    |
| <b>TS 1.14-2.63</b> | 223     | 663   | 33.6     | 180            | 678   | 26.5     | 0.006 |
| <b>TS &gt; 2.63</b> | 9       | 19    | 47.4     | 15             | 26    | 57.7     | NS    |

NS = non-significant ( $p > 0.05$ )

## Supplemental Table 2

### Primary Event Rates by Zone, TOPCAT participants with Echocardiographic Data

|               | Placebo |       |          | Spironolactone |       |          |
|---------------|---------|-------|----------|----------------|-------|----------|
|               | Event   | Total | Rate (%) | Event          | Total | Rate (%) |
| <b>Zone 1</b> | 18      | 80    | 22.5     | 12             | 78    | 15.4     |
| <b>Zone 2</b> | 21      | 100   | 21.0     | 24             | 86    | 27.9     |
| <b>Zone 3</b> | 85      | 273   | 31.1*    | 81             | 307   | 26.4     |
| <b>Zone 4</b> | 1       | 5     | 20.0     | 2              | 6     | 33.3     |

\* compared to non-zone-3,  $p = 0.03$ .

For all other comparisons,  $p > 0.05$

***Zone 3 pts have elevated risk on placebo but not on spironolactone***

**Zone 1:** HFpEF is unlikely (H2FPEF score  $\leq 2$ ). **Zone 2:** HFpEF is likely (H2FPEF score  $\geq 3$ ), and the patient is well represented in TOPCAT but unlikely benefit from spironolactone ( $TS < 1.14$ ). **Zone 3:** HFpEF is likely (H2FPEF score  $\geq 3$ ), and the patient is well represented in TOPCAT and likely benefit from spironolactone ( $1.14 \leq TS < 2.63$ ). **Zone 4:** HFpEF is likely (H2FPEF score  $\geq 3$ ), but the patient is not well represented in TOPCAT, so there is unclear benefit from spironolactone ( $TS \geq 2.63$ )

# Supplemental Figure 1

TOPCAT primary event rate—cardiovascular mortality, aborted cardiac arrest, or heart failure hospitalization—as a function of treatment arm and TS for all TOPCAT participants (Americas and Eastern Europe combined).

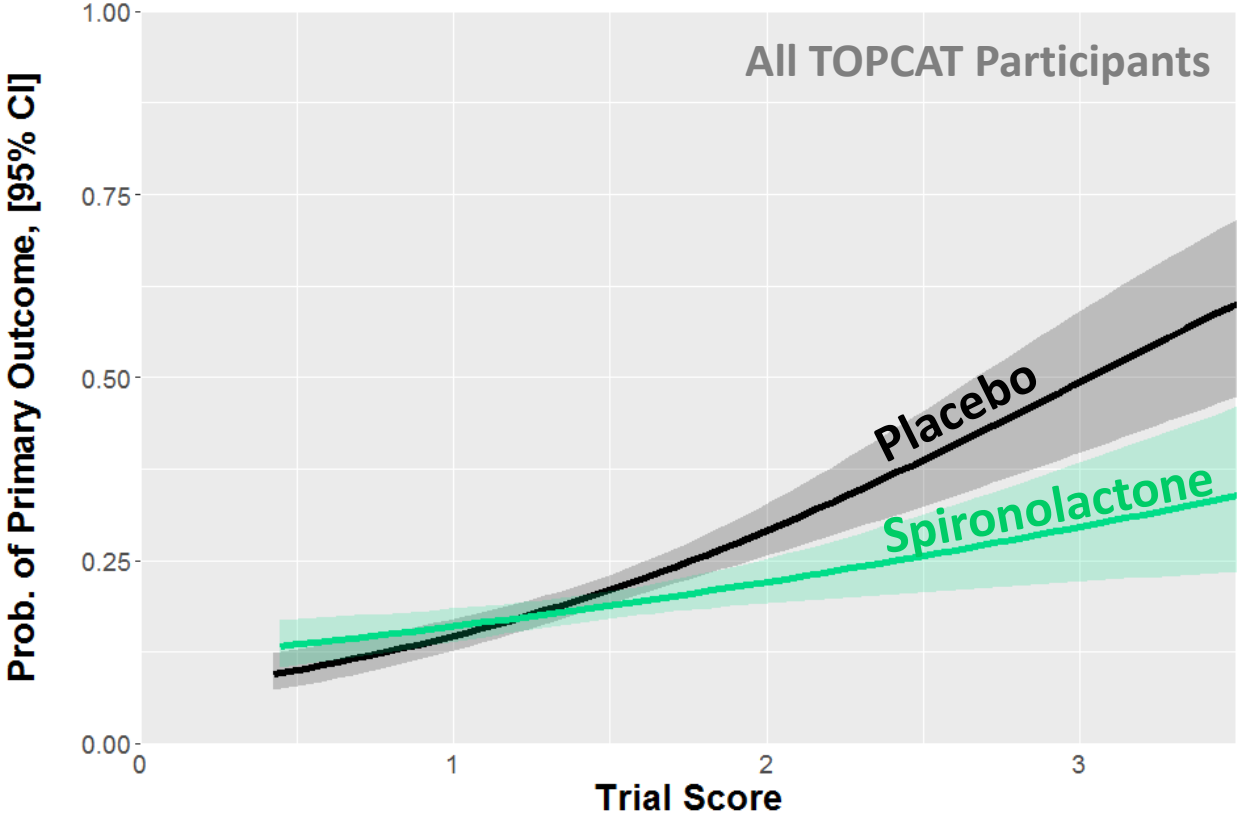

### Supplemental Figure 2

TOPCAT primary event rate—cardiovascular mortality, aborted cardiac arrest, or heart failure hospitalization—as a function of treatment arm and TS for Eastern European TOPCAT participants. Event rates among the Eastern European participants did not correlate with spironolactone treatment or TS, but were also quite low.

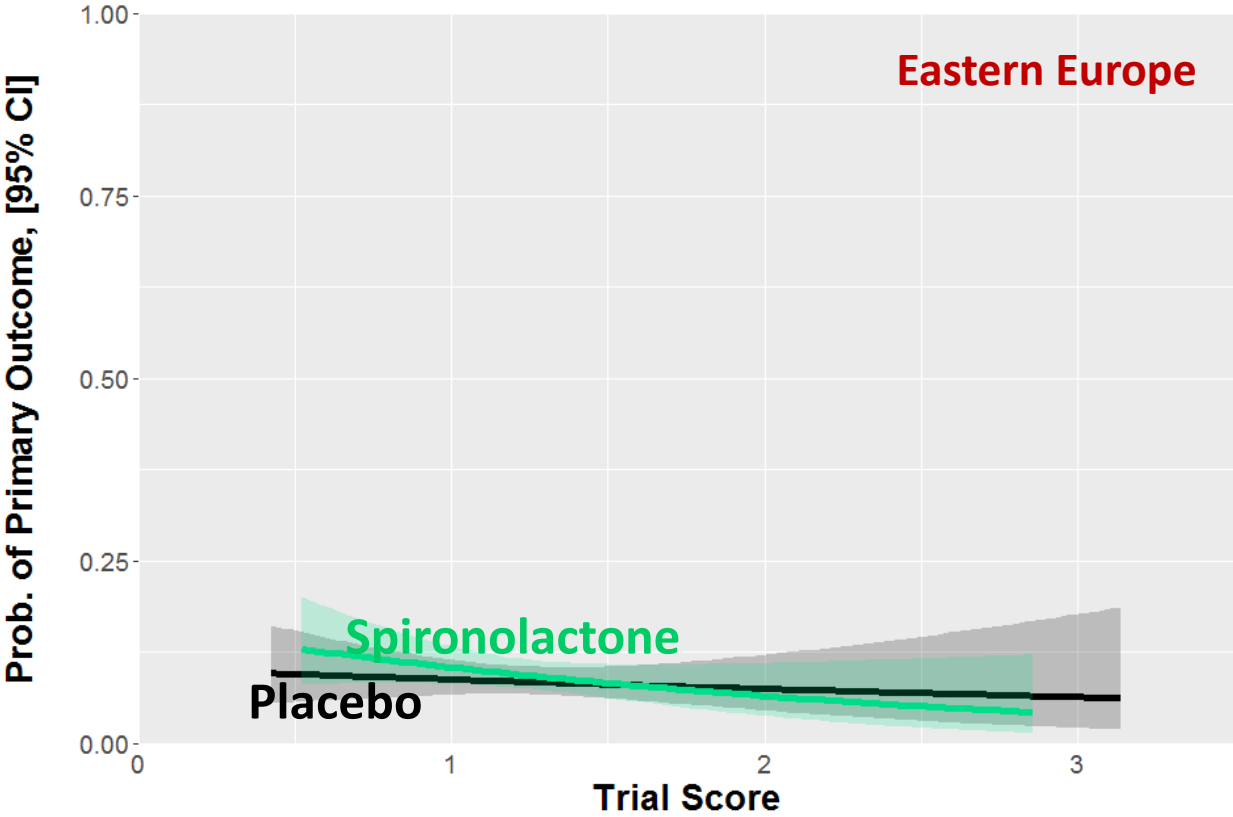

### Supplemental Figure 3

TOPCAT primary event rate—cardiovascular mortality, aborted cardiac arrest, or heart failure hospitalization—as a function of geographic location and TS. Event rates among the Eastern European participants were quite low compared to participants in the Americas.

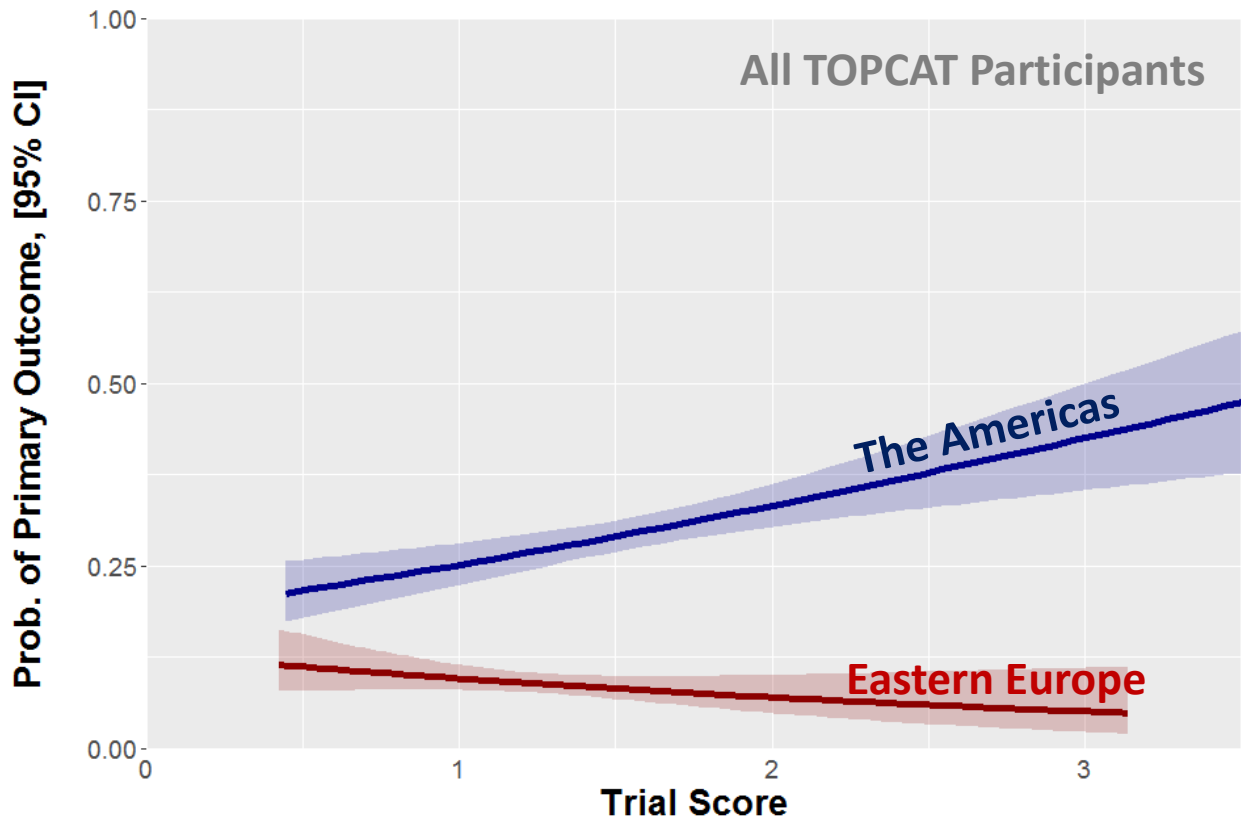

**Supplemental Figure 4** - Example screenshots of the TOPCAT Trial Score calculator. The calculator will accept input for each of the 9 component baseline characteristics of the score. If a characteristic is not available, it can be left blank. The score, text guidance, and plots will auto-refresh with any change in the characteristics. If a  $K \geq 5$  mEq/L or  $Cr \geq 2.5$  mg/dL are entered, the score will not be provided, and a notice will specify that these are generally contraindications to spironolactone.

|           | Age (y) | BMI | Creatinine (mg/dL) | K (mEq/L) | Glucose (mg/dL) | HR | SBP | LVEF (%) | LA Vol (ml) | TS   |
|-----------|---------|-----|--------------------|-----------|-----------------|----|-----|----------|-------------|------|
| →         | 65      | 22  | 2                  | 4.5       | 100             | 75 | 190 | 65       | 60          |      |
| example 1 | 73      | 33  | 1.3                | 4.4       | 125             | 61 | 116 |          |             | 0.64 |
| example 2 | 82      | 32  | 1.5                | 3.8       |                 | 95 | 135 | 60       | 70          | 1.59 |
| example 3 | 50      | 25  | 2                  | 4.8       | 100             | 55 | 120 | 75       | 50          | 2.88 |

The trial score is: **2.40**

If you deem that HFpEF is likely, the patient is in Zone 3, meaning the patient is well represented by TOPCAT-Americas, AND spironolactone is associated with benefit.

**The TOPCAT Trial Score Calculator**

*Instructions:*  
Insert your patient's characteristics into row 2 above. If a characteristic is not available, leave the cell blank.

|           | Age (y) | BMI | Creatinine (mg/dL) | K (mEq/L) | Glucose (mg/dL) | HR | SBP | LVEF (%) | LA Vol (ml) | TS   |
|-----------|---------|-----|--------------------|-----------|-----------------|----|-----|----------|-------------|------|
| →         | 65      | 22  | 2                  | 5.2       | 100             | 75 | 190 | 65       | 60          |      |
| example 1 | 73      | 33  | 1.3                | 4.4       | 125             | 61 | 116 |          |             | 0.64 |
| example 2 | 82      | 32  | 1.5                | 3.8       |                 | 95 | 135 | 60       | 70          | 1.59 |
| example 3 | 50      | 25  | 2                  | 4.8       | 100             | 55 | 120 | 75       | 50          | 2.88 |

The trial score is: **not calculated - K at this level is generally considered a contraindication to spironolactone**

If you deem that HFpEF is likely, the patient's K or Cr is generally considered a contraindication to spironolactone.

**The TOPCAT Trial Score Calculator**

*Instructions:*  
Insert your patient's characteristics into row 2 above. If a characteristic is not available, leave the cell blank.
